# Supplementary material
Source: Springer Nature journal article supplement (https://www.springermedizin.de/resource/supplementary/13019_2011_471_MOESM3_ESM.pdf/9638428)

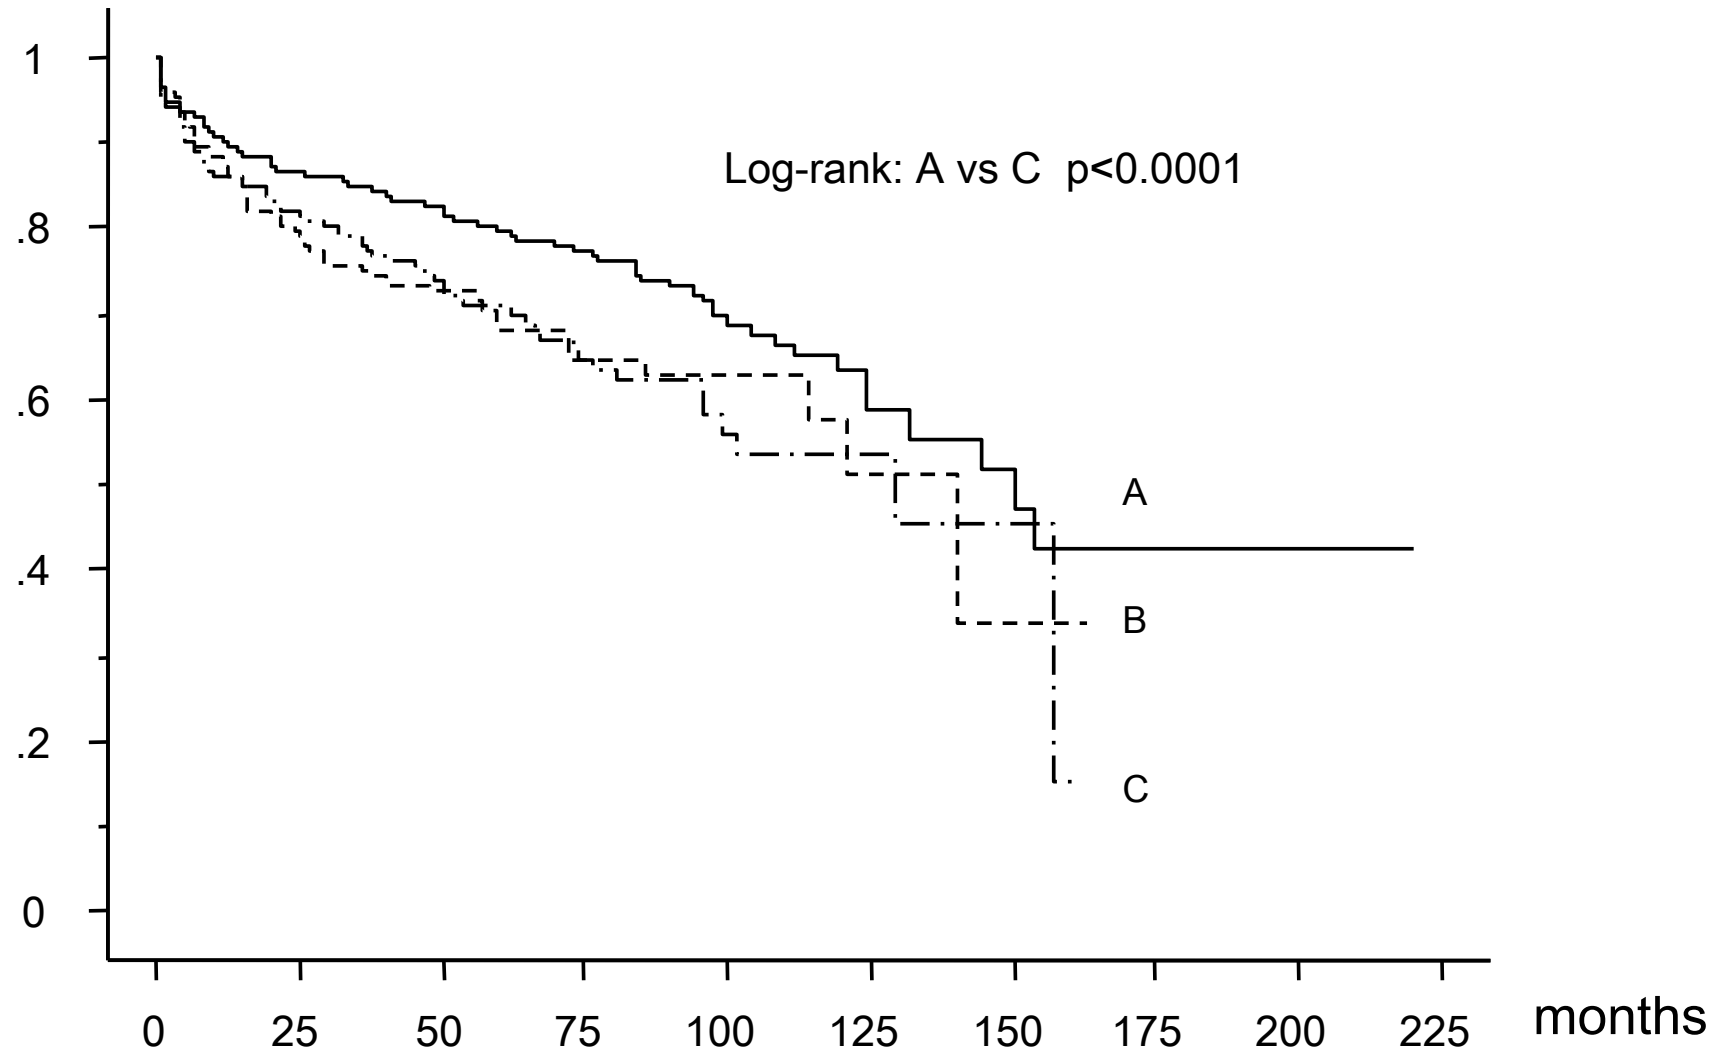

|   |     |     |    |    |
|---|-----|-----|----|----|
| A | 515 | 232 | 73 | 10 |
| B | 179 | 76  | 19 | 1  |
| C | 200 | 97  | 25 | 3  |

Supplement: MOESM3 [file 9638428]
